# Supplementary material for: Let’s Play the fMRI—Advantages of Gamified Paradigm in Examining the Motor Cortex of Young Children
Source: MDPI journal article supplement (doi:10.3390/jcm11102929), 2022-05-22
Supplement: s1 [file s1]

**Supplementary Table S1.** Differences in the number of completed active blocks and squeezing effectiveness between the two types of paradigm.

| Age (Years) | Sex | Completed Blocks (Number) |           | Percentage of Power Bar Uploading in Each Block |             |             |             |             |             |             |             |             |             |
|-------------|-----|---------------------------|-----------|-------------------------------------------------|-------------|-------------|-------------|-------------|-------------|-------------|-------------|-------------|-------------|
|             |     | S                         | G         | 1                                               |             | 2           |             | 3           |             | 4           |             | 5           |             |
|             |     |                           |           | S                                               | G           | S           | G           | S           | G           | S           | G           | S           | G           |
| 4           | F   | 1 (1.2)                   | 1.9 (0.7) | 45.4 (16.9)                                     | 60.0 (12.8) | 33.1 (16.7) | 45.1 (17.5) | 19.4 (19.3) | 27.6 (16.2) | 14.2 (11.8) | 17.5 (11.8) | 4.9 (5.5)   | 9.2 (9.5)   |
|             | M   | 0.8 (1.0)                 | 2.0 (0.8) | 37.8 (19.5)                                     | 65.2 (10.2) | 39.6 (14.6) | 44.8 (17.5) | 27.8 (14.1) | 24.0 (20.0) | 23.2 (14.5) | 19.3 (18.7) | 10.6 (8.2)  | 15.9 (8.5)  |
| 5           | F   | 2.3 (1.5)                 | 3.2 (1.0) | 56.0 (16.2)                                     | 76.1 (5.4)  | 52.7 (22.3) | 69.0 (7.3)  | 45.9 (17.5) | 59.4 (14.4) | 33.2 (15.0) | 40.3 (14.9) | 19.3 (13.8) | 28.0 (17.4) |
|             | M   | 1.7 (1.4)                 | 3.5 (1.3) | 48.0 (16.1)                                     | 78.0 (8.5)  | 45.7 (13.6) | 69.9 (9.7)  | 39.4 (18.3) | 59.1 (15.8) | 23.8 (14.6) | 52.7 (21.0) | 17.3 (14.9) | 49.2 (21.0) |
| 6           | F   | 3.6 (1.2)                 | 4.4 (0.5) | 67.4 (7.9)                                      | 81.0 (8.0)  | 65.8 (5.3)  | 73.6 (5.3)  | 51.5 (12.4) | 68.2 (6.8)  | 40.8 (14.5) | 63.4 (7.5)  | 28.4 (18.2) | 52.6 (21.0) |
|             | M   | 3.6 (1.0)                 | 4.7 (0.5) | 71.3 (12.0)                                     | 83.4 (9.4)  | 64.4 (10.2) | 75.3 (6.8)  | 56.9 (16.6) | 70.1 (9.5)  | 49.2 (15.1) | 67.4 (7.8)  | 29.2 (17.2) | 59.0 (17.9) |

F—female, M—male, S—standard, G—gamified.
